# Supplementary material for: Small-angle neutron scattering study of a dense microemulsion system formed with an ionic liquid
Source: Royal Society of Chemistry journal article supplement (doi:10.1039/c7sm01516j), 2017-01-01
Supplement: c7sm01516j1.pdf [file c7sm01516j1.pdf]

*Electronic supplementary information (ESI)*

**Small-Angle Neutron Scattering Study of a Dense Microemulsion System formed with an Ionic Liquid**

T. Kang, S. Qian, G. S. Smith, C. Do, and W. T. Heller\*

*Biology and Soft Matter Division, Oak Ridge National Laboratory, Oak Ridge, TN 37831, USA, E-mail: hellerwt@ornl.gov*

## 1. Phase boundary of the mixture, D<sub>2</sub>O / C<sub>14</sub>MIM·Cl, 1-octanol / octane

Figure S1. Ternary diagram of the mixture, D<sub>2</sub>O / C<sub>14</sub>MIM·Cl, 1-octanol / octane. Grey dashes indicate the phase boundary of 1-phase and 2-phase.<sup>a</sup>

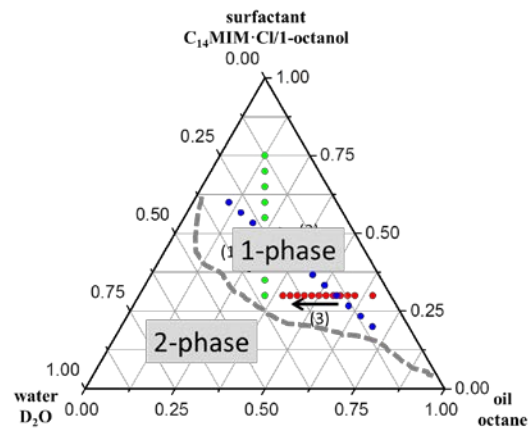

<sup>a</sup>Kang, T., unpublished results

## 2. Compositional information of samples

**Table S1.** Compositional information, weight fraction (wt%) and volume fraction ( $\phi$ ) of components of three series: (1) the concentration series of surfactant, (2) the dilution series, and (3) the concentration series of water.

| (1) concentration series of surfactant |                  |           |                |               |              | (2) dilution series |                   |           |                |                   |              | (3) concentration series of water |                  |           |                |               |              |
|----------------------------------------|------------------|-----------|----------------|---------------|--------------|---------------------|-------------------|-----------|----------------|-------------------|--------------|-----------------------------------|------------------|-----------|----------------|---------------|--------------|
| water (wt%)                            | surfactant (wt%) | oil (wt%) | $\phi_{water}$ | $\phi_{surf}$ | $\phi_{oil}$ | water (wt%)         | surfactant (wt%)  | oil (wt%) | $\phi_{water}$ | $\phi_{surf}$     | $\phi_{oil}$ | water (wt%)                       | surfactant (wt%) | oil (wt%) | $\phi_{water}$ | $\phi_{surf}$ | $\phi_{oil}$ |
| 35.0                                   | 30.0             | 35.0      | 0.28           | 0.29          | 0.43         | 10.0                | 20.0              | 69.9      | 0.07           | 0.17              | 0.76         | 5.0                               |                  | 65.0      | 0.03           | 0.26          | 0.71         |
| 32.5                                   | 35.0             | 32.5      | 0.26           | 0.34          | 0.40         | 11.7                | 23.4              | 64.9      | 0.08           | 0.20              | 0.71         | 10.0                              |                  | 60.0      | 0.07           | 0.26          | 0.66         |
| 30.0                                   | 40.0             | 30.0      | 0.24           | 0.39          | 0.37         | 13.4                | 26.7              | 60.0      | 0.10           | 0.24              | 0.67         | 12.0                              |                  | 58.0      | 0.09           | 0.27          | 0.65         |
| 27.5                                   | 45.0             | 27.5      | 0.22           | 0.44          | 0.34         | 15.0                | 30.0              | 55.0      | 0.11           | 0.27              | 0.62         | 14.0                              |                  | 56.0      | 0.10           | 0.27          | 0.63         |
| 25.0                                   | 50.0             | 25.0      | 0.20           | 0.49          | 0.31         | 16.7                | 33.4              | 50.0      | 0.12           | 0.30              | 0.57         | 16.0                              |                  | 54.0      | 0.12           | 0.27          | 0.61         |
| 22.5                                   | 55.0             | 22.5      | 0.18           | 0.54          | 0.28         | 18.3                | 36.7              | 45.0      | 0.14           | 0.34              | 0.52         | 18.0                              | 30.0             | 52.0      | 0.13           | 0.27          | 0.59         |
| 20.0                                   | 60.0             | 20.0      | 0.16           | 0.59          | 0.25         | 20.0                | 40.0              | 40.0      | 0.15           | 0.38              | 0.47         | 20.0                              |                  | 50.0      | 0.15           | 0.28          | 0.58         |
| 17.5                                   | 65.0             | 17.5      | 0.14           | 0.64          | 0.22         | 21.7                | 43.4              | 35.0      | 0.17           | 0.41              | 0.42         | 22.0                              |                  | 48.0      | 0.16           | 0.28          | 0.56         |
| 15.0                                   | 70.0             | 15.0      | 0.12           | 0.69          | 0.19         | 23.3                | 46.7              | 30.0      | 0.18           | 0.45              | 0.37         | 24.0                              |                  | 46.0      | 0.18           | 0.28          | 0.54         |
| 12.5                                   | 75.0             | 12.5      | 0.10           | 0.74          | 0.16         | 25.0                | 50.0 <sup>†</sup> | 25.0      | 0.20           | 0.49 <sup>†</sup> | 0.31         | 26.0                              |                  | 44.0      | 0.20           | 0.28          | 0.52         |
|                                        |                  |           |                |               |              | 26.7                | 53.3              | 20.0      | 0.21           | 0.53              | 0.25         | 28.0                              | 42.0             | 0.21      | 0.29           | 0.50          |              |
|                                        |                  |           |                |               |              | 28.3                | 56.7              | 15.0      | 0.23           | 0.58              | 0.19         | 30.0                              | 40.0             | 0.23      | 0.29           | 0.48          |              |
|                                        |                  |           |                |               |              | 30.0                | 60.0              | 10.0      | 0.25           | 0.62              | 0.13         |                                   |                  |           |                |               |              |

<sup>†</sup> same composition as the sample from (1) series

### 3. Results from SANS data analysis

**Table S2.** Fitting results obtained by the combined model of (1) the concentration series of surfactant.

| surfactant<br>(wt%) | $I_{sphere}(Q)$ |                 |          |                                     |                                      | $I_{Teubner-Strey}(Q)$ |                                     |                    |                  |      |                  | $B$  |
|---------------------|-----------------|-----------------|----------|-------------------------------------|--------------------------------------|------------------------|-------------------------------------|--------------------|------------------|------|------------------|------|
|                     | $\emptyset_1$   | $R(\text{\AA})$ | polydisp | $\rho_{sphere}^* (\text{\AA}^{-2})$ | $\rho_{solvent}^* (\text{\AA}^{-2})$ | $\emptyset_2$          | $\Delta\rho^{2*} (\text{\AA}^{-2})$ | $\xi (\text{\AA})$ | $d (\text{\AA})$ | $C$  | $T (\text{\AA})$ |      |
| 30.0                | 0.34            | 67.8            | 0.13     | $6.0 \times 10^{-6}$                |                                      | 0.23                   | $6.5 \times 10^{-6}$                | 76.6               | 154.3            | 5.70 | 14.8             | 0.39 |
| 35.0                | 0.32            | 55.8            | 0.14     | $6.0 \times 10^{-6}$                |                                      | 0.20                   | $6.5 \times 10^{-6}$                | 65.3               | 123.0            | 2.52 | 11.4             | 0.35 |
| 40.0                | 0.31            | 46.8            | 0.15     | $5.9 \times 10^{-6}$                | $-0.5 \times 10^{-6}$                | 0.18                   | $6.4 \times 10^{-6}$                | 62.9               | 97.6             | 2.14 | 10.0             | 0.29 |
| 45.0                | 0.39            | 34.8            | 0.28     | $5.8 \times 10^{-6}$                |                                      | 0.15                   | $6.3 \times 10^{-6}$                | 59.1               | 82.8             | 2.04 | 9.7              | 0.19 |
| 50.0                | 0.36            | 29.3            | 0.17     | $5.7 \times 10^{-6}$                |                                      | 0.13                   | $6.2 \times 10^{-6}$                | 52.4               | 69.0             | 1.77 | 9.2              | 0.12 |
| 55.0                |                 |                 |          |                                     |                                      | 0.13                   | $6.0 \times 10^{-6}$                | 47.8               | 58.5             | 0.84 | 7.7              |      |
| 60.0                |                 |                 |          |                                     |                                      | 0.13                   | $5.9 \times 10^{-6}$                | 42.0               | 50.0             | 0.35 | 6.2              |      |
| 65.0                |                 |                 |          |                                     |                                      | 0.13                   | $5.7 \times 10^{-6}$                | 35.4               | 43.4             | 0.14 | 5.6              |      |
| 70.0                |                 |                 |          |                                     |                                      | 0.12                   | $5.5 \times 10^{-6}$                | 31.5               | 38.1             | 0.12 | 6.7              |      |
| 75.0                |                 |                 |          |                                     |                                      | 0.12                   | $5.2 \times 10^{-6}$                | 27.4               | 34.2             | 0.03 | 4.0              |      |

\* SLDs are fixed based on the composition ratio.

**Table S3.** Values derived from the Teubner-Strey model of three series.

| (1) concentration series of surfactant |       |                              |                                         |                          | (2) dilution series |       |                              |                                         |                          | (3) concentration series of water |       |                              |                                         |                          |
|----------------------------------------|-------|------------------------------|-----------------------------------------|--------------------------|---------------------|-------|------------------------------|-----------------------------------------|--------------------------|-----------------------------------|-------|------------------------------|-----------------------------------------|--------------------------|
| surfactant (wt%)                       | $f_a$ | $\kappa_{\text{SANS}}/k_B T$ | $S/V$ ( $\times 10^3 \text{\AA}^{-1}$ ) | $A_s$ ( $\text{\AA}^2$ ) | surfactant (wt%)    | $f_a$ | $\kappa_{\text{SANS}}/k_B T$ | $S/V$ ( $\times 10^3 \text{\AA}^{-1}$ ) | $A_s$ ( $\text{\AA}^2$ ) | water (wt%)                       | $f_a$ | $\kappa_{\text{SANS}}/k_B T$ | $S/V$ ( $\times 10^3 \text{\AA}^{-1}$ ) | $A_s$ ( $\text{\AA}^2$ ) |
| 30.0§                                  | -0.81 | 0.42                         | 6.2                                     | 32.2                     | 20.0                | -0.72 | 0.34                         | 4.6                                     | 41.1                     | 5.0                               | -0.67 | 0.31                         | 4.6                                     | 27.0                     |
| 35.0                                   | -0.84 | 0.45                         | 6.3                                     | 28.0                     | 23.4                | -0.76 | 0.37                         | 5.1                                     | 38.0                     | 10.0                              | -0.74 | 0.35                         | 5.7                                     | 33.1                     |
| 40.0                                   | -0.88 | 0.55                         | 5.6                                     | 21.7                     | 26.7                | -0.79 | 0.40                         | 5.3                                     | 34.3                     | 12.0                              | -0.78 | 0.38                         | 5.7                                     | 32.5                     |
| 45.0                                   | -0.91 | 0.61                         | 5.0                                     | 17.3                     | 30.0‡               | -0.82 | 0.43                         | 5.4                                     | 30.8                     | 14.0                              | -0.81 | 0.41                         | 5.5                                     | 31.4                     |
| 50.0†                                  | -0.92 | 0.65                         | 4.7                                     | 14.5                     | 33.4                | -0.85 | 0.47                         | 5.6                                     | 27.9                     | 15.0‡                             | -0.82 | 0.43                         | 5.4                                     | 30.8                     |
| 55.0                                   | -0.93 | 0.70                         | 4.2                                     | 11.7                     | 36.7                | -0.86 | 0.49                         | 5.6                                     | 25.1                     | 16.0                              | -0.82 | 0.43                         | 5.3                                     | 29.9                     |
| 60.0                                   | -0.93 | 0.71                         | 3.8                                     | 9.7                      | 40.0                | -0.88 | 0.53                         | 5.4                                     | 22.1                     | 18.0                              | -0.84 | 0.46                         | 5.3                                     | 29.7                     |
| 65.0                                   | -0.93 | 0.69                         | 3.4                                     | 8.1                      | 43.4                | -0.90 | 0.58                         | 5.2                                     | 19.2                     | 20.0                              | -0.84 | 0.46                         | 5.3                                     | 29.6                     |
| 70.0                                   | -0.93 | 0.70                         | 2.8                                     | 6.3                      | 46.7                | -0.91 | 0.61                         | 5.0                                     | 17.0                     | 22.0                              | -0.85 | 0.48                         | 5.4                                     | 29.6                     |
| 75.0                                   | -0.92 | 0.68                         | 2.3                                     | 4.7                      | 50.0†               | -0.92 | 0.65                         | 4.7                                     | 14.5                     | 24.0                              | -0.85 | 0.47                         | 5.5                                     | 29.9                     |
|                                        |       |                              |                                         |                          | 53.3                | -0.92 | 0.66                         | 4.2                                     | 12.1                     | 26.0                              | -0.84 | 0.47                         | 5.6                                     | 30.3                     |
|                                        |       |                              |                                         |                          | 56.7                | -0.92 | 0.66                         | 3.7                                     | 9.9                      | 28.0                              | -0.84 | 0.46                         | 5.8                                     | 30.9                     |
|                                        |       |                              |                                         |                          | 60.0                | -0.92 | 0.66                         | 2.9                                     | 7.2                      | 30.0                              | -0.82 | 0.44                         | 6.0                                     | 31.8                     |
|                                        |       |                              |                                         |                          |                     |       |                              |                                         |                          | 35.0§                             | -0.81 | 0.42                         | 6.2                                     | 32.2                     |

†, ‡, § indicate same results.

**Table S4.** Fitting results obtained by the combined model of (2) the dilution series.

| surfactant<br>(wt%) | $I_{sphere}(Q)$ |                 |          |                                     |                                      | $I_{Teubner-Strey}(Q)$ |                                     |                    |                  |      |                  | $B$  |
|---------------------|-----------------|-----------------|----------|-------------------------------------|--------------------------------------|------------------------|-------------------------------------|--------------------|------------------|------|------------------|------|
|                     | $\phi_1$        | $R(\text{\AA})$ | polydisp | $\rho_{sphere}^* (\text{\AA}^{-2})$ | $\rho_{solvent}^* (\text{\AA}^{-2})$ | $\phi_2$               | $\Delta\rho^{2*} (\text{\AA}^{-2})$ | $\xi (\text{\AA})$ | $d (\text{\AA})$ | $C$  | $T (\text{\AA})$ |      |
| 20.0                | 0.11            | 33.0            | 0.16     |                                     |                                      | 0.07                   |                                     | 45.3               | 113.8            |      |                  | 0.37 |
| 23.4                | 0.14            | 33.6            | 0.14     |                                     |                                      | 0.08                   |                                     | 46.1               | 106.9            | 0.03 | 6.9              | 0.27 |
| 26.7                | 0.16            | 33.6            | 0.13     |                                     |                                      | 0.09                   |                                     | 47.8               | 101.7            | 0.09 | 6.9              | 0.23 |
| 30.0                | 0.19            | 34.0            | 0.13     |                                     |                                      | 0.10                   |                                     | 49.5               | 98.4             | 0.17 | 6.9              | 0.22 |
| 33.4                | 0.22            | 33.4            | 0.13     |                                     |                                      | 0.11                   |                                     | 50.5               | 91.3             | 0.24 | 7.1              | 0.18 |
| 36.7                | 0.24            | 33.2            | 0.14     | $5.7 \times 10^{-6}$                | $-0.5 \times 10^{-6}$                | 0.12                   |                                     | 51.2               | 87.9             | 0.39 | 7.6              | 0.18 |
| 40.0                | 0.27            | 32.9            | 0.15     |                                     |                                      | 0.12                   | $6.2 \times 10^{-6}$                | 52.5               | 83.8             | 0.56 | 8.0              | 0.17 |
| 43.4                | 0.30            | 32.1            | 0.16     |                                     |                                      | 0.13                   |                                     | 53.7               | 79.1             | 0.90 | 8.5              | 0.17 |
| 46.7                | 0.34            | 30.3            | 0.19     |                                     |                                      | 0.13                   |                                     | 52.8               | 73.2             | 1.39 | 9.0              | 0.16 |
| 50.0†               | 0.36            | 29.3            | 0.17     |                                     |                                      | 0.13                   |                                     | 52.4               | 69.0             | 1.77 | 9.2              | 0.12 |
| 53.3                | 0.40            | 29.1            | 0.09     |                                     |                                      | 0.13                   |                                     | 51.2               | 65.8             | 2.28 | 9.4              | 0.06 |
| 56.7                |                 |                 |          |                                     |                                      | 0.14                   |                                     | 47.7               | 61.3             | 1.87 | 8.7              |      |
| 60.0                |                 |                 |          |                                     |                                      | 0.15                   |                                     | 44.2               | 56.6             | 1.24 | 7.5              |      |

† result from series (1)

\* SLDs are fixed based on the composition ratio.

**Table S5.** Fitting results obtained by the combined model (3) the concentration series of water.

| water<br>(wt%) | $I_{sphere}(Q)$ |                 |          |                                     |                                      | $I_{Teubner-Strey}(Q)$ |                                     |                    |                  |      |                  | $B$  |
|----------------|-----------------|-----------------|----------|-------------------------------------|--------------------------------------|------------------------|-------------------------------------|--------------------|------------------|------|------------------|------|
|                | $\phi_1$        | $R(\text{\AA})$ | polydisp | $\rho_{sphere}^* (\text{\AA}^{-2})$ | $\rho_{solvent}^* (\text{\AA}^{-2})$ | $\phi_2$               | $\Delta\rho^{2*} (\text{\AA}^{-2})$ | $\xi (\text{\AA})$ | $d (\text{\AA})$ | $C$  | $T (\text{\AA})$ |      |
| 5.0            | 0.20            | 13.9            | 0.03     | $4.7 \times 10^{-6}$                | $-0.5 \times 10^{-6}$                | 0.04                   | $5.2 \times 10^{-6}$                | 21.4               | 59.6             | 0.05 | 11.0             | 0.06 |
| 10.0           | 0.15            | 27.9            | 0.04     | $5.4 \times 10^{-6}$                |                                      | 0.08                   | $5.9 \times 10^{-6}$                | 32.9               | 80.7             | 0.08 | 9.2              | 0.09 |
| 12.0           | 0.16            | 29.8            | 0.07     | $5.5 \times 10^{-6}$                |                                      | 0.09                   | $6.0 \times 10^{-6}$                | 39.2               | 86.7             | 0.05 | 6.2              | 0.14 |
| 14.0           | 0.18            | 32.5            | 0.12     | $5.6 \times 10^{-6}$                |                                      | 0.10                   | $6.1 \times 10^{-6}$                | 46.0               | 94.5             | 0.10 | 6.4              | 0.20 |
| 15.0‡          | 0.19            | 34.0            | 0.13     | $5.7 \times 10^{-6}$                |                                      | 0.10                   | $6.2 \times 10^{-6}$                | 49.5               | 98.4             | 0.17 | 6.9              | 0.22 |
| 16.0           | 0.20            | 36.4            | 0.15     | $5.7 \times 10^{-6}$                |                                      | 0.11                   | $6.2 \times 10^{-6}$                | 53.8               | 105.3            | 0.23 | 7.2              | 0.27 |
| 18.0           | 0.22            | 39.0            | 0.16     | $5.8 \times 10^{-6}$                |                                      | 0.12                   | $6.3 \times 10^{-6}$                | 59.0               | 109.5            | 0.32 | 7.4              | 0.28 |
| 20.0           | 0.24            | 42.4            | 0.17     | $5.8 \times 10^{-6}$                |                                      | 0.13                   | $6.3 \times 10^{-6}$                | 63.9               | 116.9            | 0.46 | 8.0              | 0.31 |
| 22.0           | 0.26            | 45.1            | 0.17     | $5.9 \times 10^{-6}$                |                                      | 0.14                   | $6.4 \times 10^{-6}$                | 68.0               | 120.0            | 0.64 | 8.6              | 0.30 |
| 24.0           | 0.27            | 49.4            | 0.16     | $5.9 \times 10^{-6}$                |                                      | 0.16                   | $6.4 \times 10^{-6}$                | 71.0               | 128.2            | 0.88 | 9.4              | 0.32 |
| 26.0           | 0.29            | 53.1            | 0.15     | $5.9 \times 10^{-6}$                |                                      | 0.17                   | $6.4 \times 10^{-6}$                | 73.2               | 133.3            | 1.17 | 10.2             | 0.32 |
| 28.0           | 0.30            | 55.6            | 0.14     | $6.0 \times 10^{-6}$                |                                      | 0.18                   | $6.5 \times 10^{-6}$                | 74.3               | 136.0            | 1.61 | 11.0             | 0.32 |
| 30.0           | 0.31            | 60.3            | 0.14     | $6.0 \times 10^{-6}$                |                                      | 0.20                   | $6.5 \times 10^{-6}$                | 74.4               | 145.0            | 2.22 | 12.1             | 0.34 |
| 35.0§          | 0.34            | 67.8            | 0.13     | $6.0 \times 10^{-6}$                |                                      | 0.23                   | $6.5 \times 10^{-6}$                | 76.6               | 154.3            | 5.70 | 14.8             | 0.39 |

‡ result from (2) series; § result from (1) series

\* SLDs are fixed based on the composition ratio.
